# Supplementary material for: The remarkable effect of the 7-substituent in the diastereoselective oxidative rearrangement of indoles: Asymmetric synthesis of 3,3-disubstituted oxindoles
Source: Royal Society of Chemistry journal article supplement (doi:10.1039/b613716d), 2006-10-26
Supplement: b613716d.pdf [file b613716d.pdf]

# The Remarkable Effect of the 7-Substituent in the Diastereoselective Oxidative Rearrangement of Indoles: Asymmetric Synthesis of 3,3-Disubstituted Oxindoles

*Mathilde Lachia, Cyril Poriel, Alexandra M. Z. Slawin and Christopher J. Moody*

## ELECTRONIC SUPPLEMENTARY INFORMATION

### EXPERIMENTAL PROCEDURES AND X-RAY CRYSTAL STRUCTURES

#### General procedure for the chlorination and rearrangement

To a solution of the starting indole **7** (0.15 mmol) in dichloromethane (5 mL), protected from the light, was added *tert*-butyl hypochlorite (53  $\mu$ L, 0.45 mmol) in dichloromethane (1 mL). After 1 h, a further quantity of *tert*-butyl hypochlorite (30  $\mu$ L) in dichloromethane (1 mL) was added and the solution was stirred for 1 h. The solvents were removed under vacuum. The residue was taken up with dichloromethane (3 mL) and anhydrous ethanol (1.5 mL). Then, 500  $\mu$ L of a solution of acetyl chloride (500  $\mu$ L) and ethanol (9.5 mL) were added. The solution was stirred, protected from the light, overnight under N<sub>2</sub>. The solvents were then removed and the residue was purified by flash chromatography over silica gel eluting with dichloromethane and ethyl acetate (7 : 3) to give the oxindole **8**.

In assigning HNMR spectra of oxindoles, the following numbering system is used. The use of H<sub>5</sub> cis/trans refers to the relative positions of the diastereotopic CH<sub>2</sub> protons with respect to H<sub>1</sub>'.

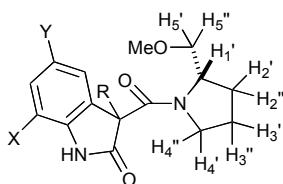

**(*R,S*)-2-Oxo-3-phenyl-1,3-dihydroindole-3-carboxylic acid (*S*)-2-methoxymethylpyrrolidinyl amide 8a**

According to the general procedure, the title compound was obtained from the indole **7a** as a bright colourless solid (82%) as a mixture of diastereoisomers in a 1.3 : 1 ratio, mp 82 – 86 °C (light petroleum); (Found:  $M^+$ , 350.1620.  $C_{21}H_{22}N_2O_3$  requires 350.1630);  $\nu_{\max}$  (KBr)/ $cm^{-1}$  3432 (NH), 3245, 2927, 1724 (C=O), 1617 (C=O), 1472, 1401, 1319, 1237, 1197, 1112;  $\nu_H$  (300 MHz;  $CDCl_3$ ) 8.91/8.90 (1 H, s, NH  $\square$  2), 7.32-7.22 (7 H, m, ArH), 7.12-7.05 (1 H, d,  $J$  7.5, ArH), 6.92-6.88 (1 H, m, ArH), 4.32 (1 H, m,  $H_1'$   $\square$  2), 3.61/3.59 (1 H, dd,  $J$  9.4, 3.0,  $H_5''$  *cis*  $\square$  2), 3.47/3.41 (1 H, dd,  $J$  9.4, 7.0,  $H_5'$  *trans*  $\square$  2), 3.34/3.30 (3 H, s, OMe  $\square$  2), 3.27-3.24 (0.5 H, m,  $H_{4a}''$ ), 3.22-3.17 (0.5 H, m,  $H_{4b}''$ ), 3.06-2.98 (0.5 H, m,  $H_{4b}'$ ), 2.88-2.80 (0.5 H, m,  $H_{4a}'$ ), 1.96-1.57 (4 H, m,  $H_3'+H_3''$ ,  $H_2'+H_2''$   $\square$  2);  $\nu_C$  (75 MHz;  $CDCl_3$ ) 176.1 (C), 166.6/165.5 (C), 141.2/140.8 (C), 137.5/137.0 (C), 129.2/129.1 (CH), 128.9/128.8 (CH), 128.6/128.4 (CH), 127.9/127.6 (CH), 127.8/127.7 (CH), 125.7/125.6 (CH), 122.9/122.8 (CH), 110.6/110.4 (C), 72/71.7 ( $CH_2$ ), 66.5/66.3 (C), 59/58.9 (Me), 58.3 (CH), 47.5/47.3 ( $CH_2$ ), 26.8/26.7 ( $CH_2$ ), 24.7/24.6 ( $CH_2$ );  $m/z$  (FI) 351 ( $MH^+$ , 21%), 350 ( $M^+$ , 100), 280 (12), 127 (6).

**(*S*)-7-Bromo-2-oxo-3-phenyl-1,3-dihydroindole-3-carboxylic acid (*S*)-2-methoxymethylpyrrolidinyl amide 8b**

According to the general procedure, the title compound was obtained as a colourless solid (90%) from the indole **7b**. The title compound was obtained as a mixture of diastereoisomers (8 : 1). The major diastereoisomer was separated by crystallization from light petroleum and chloroform (9 : 1); mp 177 – 178 °C (from chloroform/light petroleum);  $[\alpha]_D^{23}$  -75 ( $c$  1.0,  $CHCl_3$ ); (Found:  $MH^+$ , 429.0790.  $C_{21}H_{21}^{79}BrN_2O_3 + H$  requires 429.0814);  $\nu_{\max}$  ( $CHCl_3$ )/ $cm^{-1}$

3422 (NH), 2982, 2931, 2881, 1731 (C=O), 1640 (C=O), 1454, 1398, 1308, 1137, 1112, 1068;  $\delta_{\text{H}}$  (270 MHz; CDCl<sub>3</sub>) 7.64 (1 H, s, NH), 7.42 (1 H, dd, *J* 8.2, 1.0, ArH), 7.36-7.30 (5 H, m, ArH), 7.21 (1 H, d, *J* 7.6, ArH), 7.00 (1 H, dd, *J* 8.0, 7.7, ArH), 4.32 (1 H, m, H<sub>1</sub>' ), 3.57 (1 H, dd, *J* 9.4, 3.2, H<sub>5</sub>' *cis*), 3.42 (1 H, dd, *J* 9.4, 6.9, H<sub>5</sub>' *trans*), 3.32 (3 H, s, OMe), 3.20-3.02 (2 H, m, H<sub>4</sub>' , H<sub>4</sub>''), 1.92-1.58 (4 H, m, H<sub>2</sub>''+H<sub>2</sub>' , H<sub>3</sub>''+H<sub>3</sub>'');  $\delta_{\text{C}}$  (100 MHz; CDCl<sub>3</sub>) 174.1 (C), 165.6 (C), 139.8 (C), 136.7 (C), 131.6 (CH), 130.7 (C), 128.9 (CH), 128.1 (CH), 127.3 (CH), 125.1 (CH), 124.1 (CH), 103.9 (C), 71.7 (CH<sub>2</sub>), 67.9 (C), 58.9 (Me), 58.6 (CH), 47.9 (CH<sub>2</sub>), 26.8 (CH<sub>2</sub>), 24.7 (CH<sub>2</sub>); *m/z* (ES) 453/451 (MNa<sup>+</sup>, 58/60%), 431/429 (MH<sup>+</sup>, 100/98%).

**(S)-7-Bromo-3-(4-chlorophenyl)-2-oxo-1,3-dihydroindole-3-carboxylic acid (S)-2-methoxymethylpyrrolidinyl amide 8c**

According to the general procedure, the *title compound* was obtained from the indole **7c** as a bright colourless solid (82%) as a mixture of diastereoisomers in a 9.5 : 1 ratio. The major isomer **8c** is separated from the mixture by crystallization in CDCl<sub>3</sub>/hexanes, mp 92 – 96 °C (CDCl<sub>3</sub>/hexanes); (Found: C, 54.1; H, 4.4; N, 5.6. C<sub>21</sub>H<sub>20</sub>BrClN<sub>2</sub>O<sub>3</sub> requires C, 54.4; H, 4.35; N, 6.0%); (Found: MH<sup>+</sup>, 463.0406. C<sub>21</sub>H<sub>20</sub><sup>79</sup>Br<sup>35</sup>ClN<sub>2</sub>O<sub>3</sub> + H requires 463.0424);  $[\alpha]_{\text{D}}^{27}$  -65 (*c* 0.15, CH<sub>2</sub>Cl<sub>2</sub>);  $\nu_{\text{max}}$  (KBr)/cm<sup>-1</sup> 3431 (NH), 3217, 2926, 1731 (C=O), 1637 (C=O), 1618, 1491, 1473, 1450, 1400, 1311, 1240, 1162, 1185, 1125, 1094, 1015, 822, 770, 747;  $\delta_{\text{H}}$  (300 MHz; CDCl<sub>3</sub>) 7.87 (1 H, s, NH), 7.41 (1 H, d, *J* 8.1, ArH), 7.29-7.15 (5 H, m, ArH), 6.99 (1 H, dd, *J* 8.1, 7.7, ArH), 4.28 (1 H, m, H<sub>1</sub>' ), 3.47 (1 H, dd, *J* 9.4, 3, H<sub>5</sub>' *cis*), 3.41 (1 H, dd, *J* 9.4, 6.9, H<sub>5</sub>' *trans*), 3.26 (3 H, s, OMe), 3.26-3.13 (1 H, m, H<sub>4</sub>''), 2.91-2.84 (1 H, m, H<sub>4</sub>' ), 1.91-1.61 (4 H, m, H<sub>3</sub>''+H<sub>3</sub>'', H<sub>2</sub>''+H<sub>2</sub>'');  $\delta_{\text{C}}$  (75 MHz; CDCl<sub>3</sub>) 162.7 (C), 134.3 (C), 133.1 (C), 132.5 (C), 130.5 (CH), 129.1 (CH), 129 (C), 127.3 (C), 126.5 (CH), 121.8 (CH), 119.3

(CH), 117.8 (C), 105.1 (C-Br), 72.4 (CH<sub>2</sub>), 59 (Me), 56.6 (CH), 49.1 (CH<sub>2</sub>), 27.2 (CH<sub>2</sub>), 25 (CH<sub>2</sub>); *m/z* (CI) 465/463 (MH<sup>+</sup>, 41/22%), 142 (100).

**(*R,S*)-5-Bromo-2-oxo-3-phenyl-1,3-dihydroindole-3-carboxylic acid (*S*)-2-methoxymethylpyrrolidinyl amide 8d**

According to the general procedure, the title compound was obtained as a colourless solid (93%) starting from the indole **7d**. The title compound was obtained as a 1.4 : 1 mixture of diastereoisomers, mp 95 – 100 °C (from light petroleum); (Found: C, 59.0; H, 5.0; N, 6.3. C<sub>21</sub>H<sub>21</sub>BrN<sub>2</sub>O<sub>3</sub> requires C, 58.8; H, 4.9; N, 6.5%); (Found: MH<sup>+</sup>, 429.0796. C<sub>21</sub>H<sub>21</sub><sup>79</sup>BrN<sub>2</sub>O<sub>3</sub> + H requires 429.0814);  $\nu_{\max}$  (CHCl<sub>3</sub>)/cm<sup>-1</sup> 3430 (NH), 1730 (C=O), 1632 (C=O), 1117;  $\nu_{\text{H}}$  (400 MHz; CDCl<sub>3</sub>) 8.37 (0.6 H, s, NH), 8.35 (0.4 H, s, NH), 7.40-7.29 (7 H, m, ArH), 6.77 (1 H, dd, *J* 10.6, 8.6, ArH), 4.33 (1 H, m, H<sub>1</sub>' ), 3.58-3.40 (2 H, m, H<sub>5</sub>' + H<sub>5</sub>''), 3.38 (1.73 H, s, OMe), 3.33 (1.27 H, s, OMe), 3.18-2.86 (2 H, m, H<sub>4</sub>' + H<sub>4</sub>''), 1.92-1.60 (4 H, m, H<sub>2</sub>' + H<sub>2</sub>'', H<sub>3</sub>' + H<sub>3</sub>'');  $\nu_{\text{C}}$  (100 MHz; CDCl<sub>3</sub>) 175.2 (C), 165.8 (C), 165.7 (C), 139.7 (C), 139.4 (C), 137.2 (C), 136.6 (C), 132.1 (C), 131.9 (CH), 131.7 (CH), 131.4 (C), 129.3 (CH), 129.2 (CH), 129.0 (CH), 128.9 (CH), 128.1 (CH), 127.9 (CH), 127.4 (CH), 127.2 (CH), 126.6 (CH), 115.5 (C), 115.4 (C), 111.7 (CH), 111.6 (CH), 72.1 (C), 71.8 (C), 66.9 (CH<sub>2</sub>), 66.7 (CH<sub>2</sub>), 59.04 (CH), 59.01 (CH), 58.6 (Me), 58.5 (Me), 48.2 (CH<sub>2</sub>), 48.0 (CH<sub>2</sub>), 26.9 (CH<sub>2</sub>), 26.8 (CH<sub>2</sub>), 24.9 (CH<sub>2</sub>), 24.8 (CH<sub>2</sub>) ; *m/z* (ES) 431/429 (M<sup>+</sup>, 58/61%).

**(*R,S*)-5-Bromo-3-(4-chlorophenyl)-2-oxo-1,3-dihydroindole-3-carboxylic acid (*S*)-2-methoxymethylpyrrolidinyl amide 8e**

According to the general procedure, the title compound was obtained as a colourless solid (90%) starting from the indole **7e**. The title compound was obtained as a mixture of diastereoisomers (1.5 : 1), mp 95 – 97 °C (from chloroform/light petroleum); (Found: C, 54.7;

H, 4.4; N, 5.7.  $C_{21}H_{20}BrClN_2O_3$  requires C, 54.4; H, 4.35; N, 6.0%); (Found:  $MH^+$ , 463.0393.  $C_{21}H_{20}^{79}Br^{35}ClN_2O_3 + H$  requires 463.0424);  $\nu_{max}$  ( $CHCl_3$ )/ $cm^{-1}$  3430 (NH), 1733 (C=O), 1635 (C=O), 1395, 1095;  $\nu_H$  (400 MHz;  $CDCl_3$ ) 8.75 (0.60 H, s, NH), 8.74 (0.40 H, s, NH), 7.44-7.36 (2 H, m, ArH), 7.33-7.30 (2 H, m, ArH), 7.26-7.23 (2 H, m, ArH), 6.81 (0.60 H, d,  $J$  8.3, ArH), 6.77 (0.40 H, d,  $J$  8.3, ArH), 4.31 (1 H, m,  $H_1'$ ), 3.56-3.47 (2 H, m,  $H_5'+H_5''$ ), 3.36 (1.20 H, s, OMe), 3.32 (1.80 H, s, OMe), 3.28-3.18 (1H, m,  $H_4'$ ), 3.00-2.94 (0.40 H, m,  $H_4''b$ ), 2.88-2.82 (0.60 H, m,  $H_4''a$ ), 1.92-1.60 (4 H, m,  $H_2'+H_2''$ ,  $H_3'+H_3''$ );  $\nu_C$  (100 MHz;  $CDCl_3$ ) 175.1 (C), 175.0 (C), 165.5 (C), 165.4 (C), 140.1 (C), 139.7 (C), 135.6 (C), 134.9 (C), 134.3 (C), 134.1 (C), 132.3 (CH), 132.0 (CH), 131.1 (C), 130.4 (C), 129.2 (CH), 129.0 (CH), 128.86 (CH), 128.81 (CH), 128.75 (CH), 115.6 (C), 115.5 (C), 112.0 (CH), 111.9 (CH), 71.99 (CH<sub>2</sub>), 71.73 (CH<sub>2</sub>), 66.07 (C), 65.91 (C), 59.06 (CH), 59.01 (CH), 58.69 (Me), 58.60 (Me), 47.8 (CH<sub>2</sub>), 47.6 (CH<sub>2</sub>), 26.8 (CH<sub>2</sub>), 24.87 (CH<sub>2</sub>), 24.80 (CH<sub>2</sub>);  $m/z$  (ES) 465/463 ( $MH^+$ , 58/46 %).

**(S)-7-Chloro-2-oxo-3-phenyl-1,3-dihydroindole-3-carboxylic acid (S)-2-methoxymethylpyrrolidinyl amide 8f**

According to the general procedure, the title compound was obtained as a colourless solid (91%) starting from the indole **7f**. The compound was obtained as a mixture of diastereoisomers (6 : 1). The major diastereoisomer was separated by crystallization from  $CDCl_3$ /hexane; mp 174 – 175 °C (from  $CDCl_3$ /hexane);  $[\alpha]_D^{21}$  -60.7 ( $c$  1.1,  $CHCl_3$ ); (Found:  $MH^+$ , 385.1317.  $C_{21}H_{21}^{35}ClN_2O_3 + H$  requires 385.1319);  $\nu_{max}$  ( $CHCl_3$ )/ $cm^{-1}$  3425 (NH), 3197, 2938, 1731 (C=O), 1632 (C=O), 1457, 1393, 1305, 1133, 907;  $\nu_H$  (400 MHz;  $CDCl_3$ ) 8.12 (1 H, s, NH), 7.39-7.29 (5 H, ArH), 7.27 (1 H, dd,  $J$  8.2, 1.0, ArH), 7.19 (1 H, d,  $J$  7.4, ArH), 7.05 (1 H, dd,  $J$  8.2, 7.6, ArH), 4.34 (1 H, m,  $H_1'$ ), 3.58 (1 H, dd,  $J$  9.2, 3.2,  $H_5'$  *cis*), 3.43 (1 H, dd,  $J$  9.2, 6.8,  $H_5''$  *trans*), 3.32 (3 H, s, OMe), 3.19 (1 H, dt,  $J$  10.6, 6.7,  $H_4'$ ), 3.09

(1 H, dt,  $J$  10.6, 6.6,  $H_4''$ ), 1.91-1.85 (2 H, m,  $H_2+H_2'$ ), 1.82-1.55 (2 H, m,  $H_3'+H_3''$ );  $\delta_C$  (100 MHz;  $CDCl_3$ ) 174.7 (C), 165.6 (C), 138.4 (C), 136.9 (C), 131.0 (C), 128.99 (CH), 128.94 (CH), 128.2 (CH), 127.5 (CH), 124.7 (CH), 123.9 (CH), 115.4 (C), 71.8(CH<sub>2</sub>), 67.7 (C), 59.1 (CH), 56.7 (Me), 48.0 (CH<sub>2</sub>), 26.9 (CH<sub>2</sub>), 24.8 (CH<sub>2</sub>);  $m/z$  (ES<sup>+</sup>) 387/385 (MH<sup>+</sup>, 22/100).

**(S)-7-Fluoro-2-oxo-3-phenyl-1,3-dihydroindole-3-carboxylic acid (S)-2-methoxymethylpyrrolidinyl amide 8g**

According to the general procedure, the title compound was obtained as a colourless solid (95%) starting from the indole **7g**. The title compound was obtained as a 2 : 1 mixture of diastereoisomers. The major diastereoisomer was separated by crystallization from  $CDCl_3$ /hexane; mp 195 – 196 °C (from  $CDCl_3$ /hexane);  $[\alpha]_D^{23}$  15 ( $c$  0.3,  $CHCl_3$ ); (Found: MH<sup>+</sup>, 369.1607.  $C_{21}H_{21}FN_2O_3 + H$  requires 369.1614);  $\delta_{max}$  ( $CHCl_3$ )/ $cm^{-1}$  3431 (NH), 2927, 1736 (C=O), 1643 (C=O), 1491, 1467, 1384, 1305, 1112;  $\delta_H$  (400 MHz;  $CDCl_3$ ) 7.44 (1 H, s, NH), 7.37-7.31 (5 H, m, ArH), 7.09-7.06 (3 H, m, ArH), 4.34 (1 H, m,  $H_1'$ ), 3.58 (1 H, dd,  $J$  9.2, 3.2,  $H_5'$  *cis*), 3.43 (1 H, dd,  $J$  9.2, 6.8,  $H_5''$  *trans*), 3.32 (3 H, s, OMe), 3.21 (1 H, dt,  $J$  10.7, 6.7,  $H_4'$ ), 3.02 (1 H, dt,  $J$  10.7, 6.7,  $H_4''$ ), 1.91-1.87 (2 H, m,  $H_2 H_2'$ ), 1.82-1.55 (2 H, m,  $H_3'+H_3''$ );  $\delta_C$  (100 MHz;  $CDCl_3$ ) 174.6 (C), 165.7 (C), 147.0 (C, d,  $J$  243), 136.7 (C), 131.9 (C), 128.7 (CH), 128.1 (C), 128.0 (CH), 127.5 (CH), 123.4 (CH, d,  $J$  6), 121.8 (CH, d,  $J$  3), 115.9 (CH, d,  $J$  17), 71.7 (CH<sub>2</sub>), 66.7 (C, d,  $J$  2), 58.9 (CH), 58.4 (Me), 47.8 (CH<sub>2</sub>), 26.8 (CH<sub>2</sub>), 24.7 (CH<sub>2</sub>);  $m/z$  (ES) 369/370(M<sup>+</sup>, 23/100%), 142 (9%).

**(S)-2-Oxo-3,7-diphenyl-1,3-dihydroindole-3-carboxylic acid (S)-2-methoxymethylpyrrolidinyl amide 8h**

According to the general procedure, the title compound was obtained as a colourless solid (22 mg, 75%) starting from the indole **7h**. The title compound was obtained as a mixture of

diastereoisomers (11 : 1). The major diastereoisomer was separated by crystallization in hexane/ethyl acetate (9 : 1); mp 164 – 165 °C (from ethyl acetate/light petroleum);  $[\alpha]_D^{23}$  -7 (c 0.3, CHCl<sub>3</sub>); (Found: MH<sup>+</sup>, 427.2010. C<sub>27</sub>H<sub>26</sub>N<sub>2</sub>O<sub>3</sub> + H requires 427.2022);  $\nu_{\max}$  (CHCl<sub>3</sub>)/cm<sup>-1</sup> 3427 (NH), 2929, 1727 (C=O), 1631 (C=O), 1458, 1392, 1302, 1095, 908;  $\delta_{\text{H}}$  (400 MHz; CDCl<sub>3</sub>) 7.66 (1 H, s, NH), 7.50-7.27 (12 H, m, ArH), 7.19 (1 H, t, *J* 7.6, ArH), 4.36 (1 H, m, H<sub>1</sub>' ), 3.59 (1 H, dd, *J* 9.2, 2.8, H<sub>5</sub>' *cis*), 3.43 (1 H, dd, *J* 9.2, 6.8, H<sub>5</sub>'' *trans*), 3.32 (3 H, s, OMe), 3.25-3.19 (1 H, m, H<sub>4</sub>' ), 3.05-3.00 (1 H, m, H<sub>4</sub>'' ), 1.89-1.21 (4 H, m, H<sub>2</sub>''+H<sub>2</sub>' , H<sub>3</sub>' +H<sub>3</sub>'' );  $\delta_{\text{C}}$  (100 MHz; CDCl<sub>3</sub>) 175.5 (C), 166.2 (C), 137.9 (C), 137.3 (C), 137.2 (C), 129.7 (C), 129.31 (CH), 129.28 (CH), 128.7 (CH), 128.0 (2  $\square$  CH), 127.9 (CH), 127.6 (CH), 125.2 (CH), 124.5 (C), 123.3 (CH), 71.7 (CH<sub>2</sub>), 66.7 (C), 58.9 (CH), 58.4 (Me), 47.7 (CH<sub>2</sub>), 26.8 (CH<sub>2</sub>), 24.7 (CH<sub>2</sub>); *m/z* (ES) 449 (MNa<sup>+</sup>, 34%), 427 (MH<sup>+</sup>, 100%), 263 (6%).

**(S)-7-Bromo-3-methyl-2-oxo-1,3-dihydroindole-3-carboxylic acid (S)-2-methoxymethylpyrrolidinyl amide 8i**

According to the general procedure, the title compound was obtained as a colourless solid (90%) starting from the indole **7i**. The title compound was obtained as a mixture of diastereoisomers (4 : 1). The major diastereoisomer was separated by crystallization from light petroleum and chloroform (9 : 1); mp 191 – 192 °C (from chloroform/light petroleum);  $[\alpha]_D^{23}$  117 (c 1.0, CHCl<sub>3</sub>); (Found: MH<sup>+</sup>, 367.0633. C<sub>16</sub>H<sub>19</sub><sup>79</sup>BrN<sub>2</sub>O<sub>3</sub> + H requires 367.0657);  $\nu_{\max}$  (CHCl<sub>3</sub>)/cm<sup>-1</sup> 3422 (NH), 2982, 2931, 2881, 1731 (C=O), 1640 (C=O), 1454, 1398, 1308, 1137, 1112, 1068;  $\delta_{\text{H}}$  (270 MHz; CDCl<sub>3</sub>) 8.04 (1 H, s, NH), 7.38 (1 H, dd, *J* 1.1, 9.2, ArH), 7.06 (1 H, d, *J* 7.3, ArH), 6.94 (1 H, t, *J* 7.3, ArH), 4.33-4.28 (1 H, m, H<sub>1</sub>' ), 3.50 (1 H, dd, *J* 9.3, 3.2, H<sub>5</sub>' *cis*), 3.36-3.32 (4 H, m, *J* 9.2, 6.8, H<sub>5</sub>'' *trans*, OMe), 3.29 (1 H, m, H<sub>4</sub>' ), 2.49 (1 H, m, H<sub>4</sub>'' ), 1.89-1.73 (4 H, m, H<sub>2</sub>''+H<sub>2</sub>' , H<sub>3</sub>' +H<sub>3</sub>'' ), 1.67 (3 H, s, Me);  $\delta_{\text{C}}$  (75 MHz; CDCl<sub>3</sub>) 176.5 (C), 165.6 (C), 139.5 (C), 132.6 (C), 131.3 (CH), 124.6 (CH), 121.9 (CH),

102.8 (C), 71.6 (CH<sub>2</sub>), 58.9 (Me), 58.2 (CH), 57.7 (C), 44.8 (CH<sub>2</sub>), 26.7 (CH<sub>2</sub>), 24.3 (Me);  
*m/z* (ES+) 391/389 (MNa<sup>+</sup>, 66/66%), 369/367 (MH<sup>+</sup>, 98/100%), 263 (6%).



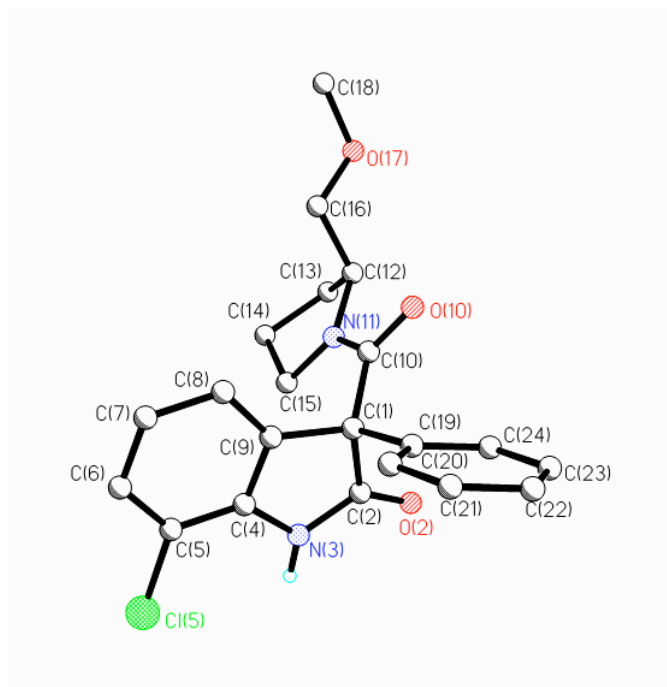

X-ray crystal structure of oxindole **8f**.

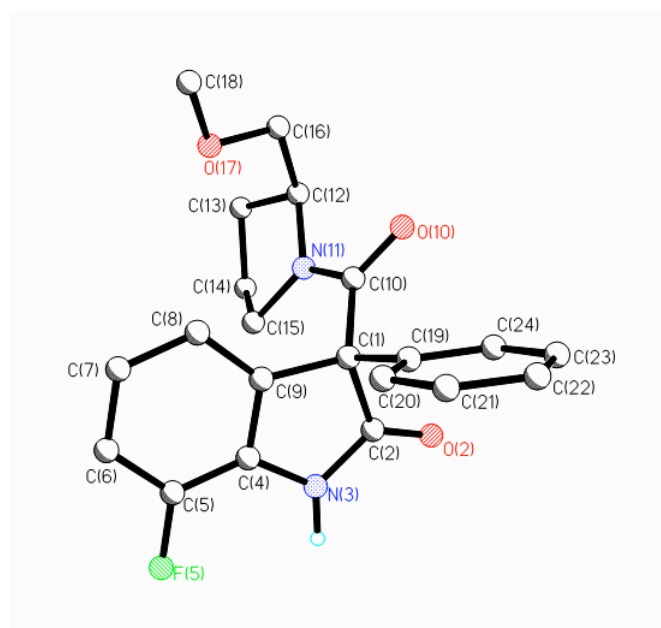

X-ray crystal structure of oxindole **8g**.

## Crystal data

Full hemisphere of data collected, corrected for Lorentz and polarization and for absorption using multiple equivalent reflections. Refinements on  $F^2$  using SHELXTL.

**Compound 8f** Rigaku MM007 high brilliance generator, confocal optics, Saturn 70 detector, colourless prism 0.08 x 0.08 x 0.08 mm,  $C_{21}H_{21}Cl_1N_2O_3$ ,  $M_r = 384.85$ , orthorhombic, space group  $P2(1)2(1)2(1)$ ,  $a = 8.9714(7)$ ,  $b = 14.1418(11)$ ,  $c = 15.1487(12)$  Å,  $V = 1921.9(3)$  Å<sup>3</sup>,  $Z = 4$ ,  $2\theta_{max} 50.7^\circ$ ,  $MoK\alpha = 0.71073$  Å,  $T = 93(2)$  K,  $\rho_{calcd} = 1.330$  gcm<sup>-3</sup>,  $\mu = 0.223$  mm<sup>-1</sup> (max, min transmission 1.00, 0.9016), 13683 reflections collected, 3381 unique [ $R_{(int)} = 0.0198$ ],  $R_1 = 0.0221$ ,  $wR2 = 0.0554$  for 3349 observed reflections [ $I > 2\sigma(I)$ ], max and min residual electron density 0.163, -0.159 e Å<sup>-3</sup>. Flack parameter -0.04(4).

**Compound 8g** Rigaku MM007 high brilliance generator, confocal optics, Mercury detector, colourless prism 0.05 x 0.05 x 0.05 mm,  $C_{21}H_{21}F_1N_2O_3$ ,  $M_r = 368.40$ , orthorhombic, space group  $P2(1)2(1)2(1)$ ,  $a = 9.797(2)$ ,  $b = 12.303(2)$ ,  $c = 14.883(3)$  Å,  $V = 1793.9(6)$  Å<sup>3</sup>,  $Z = 4$ ,  $2\theta_{max} 50.7^\circ$ ,  $MoK\alpha = 0.71073$  Å,  $T = 93(2)$  K,  $\rho_{calcd} = 1.364$  gcm<sup>-3</sup>,  $\mu = 0.099$  mm<sup>-1</sup> (max, min transmission 1.00, 0.8034), 11683 reflections collected, 3208 unique [ $R_{(int)} = 0.0399$ ],  $R_1 = 0.0369$ ,  $wR2 = 0.0812$  for 2956 observed reflections [ $I > 2\sigma(I)$ ], max and min residual electron density 0.143, -0.196 e Å<sup>-3</sup>. Flack parameter 0.3(8).

CCDC-609781-609784 contain the supplementary crystallographic data for this paper.

These data can be obtained free of charge via [www.ccdc.cam.ac.uk/conts/retrieving.html](http://www.ccdc.cam.ac.uk/conts/retrieving.html)

(or from the Cambridge Crystallographic Data Centre, 12 Union Road, Cambridge,  
CB21EZ, UK; fax: (+44) 1223-336-033; or [deposit@ccdc.cam.ac.uk](mailto:deposit@ccdc.cam.ac.uk)).CCDC.
